# Supplementary material for: Human Retinal Organoids Provide a Suitable Tool for Toxicological Investigations: A Comprehensive Validation Using Drugs and Compounds Affecting the Retina
Source: PubMed Central journal article supplement (PMC8929478; doi:10.1093/stcltm/szab010), 2022-02-19
Supplement: szab010_suppl_supplementary_material.pdf [file szab010_suppl_supplementary_material.pdf]

## Supplement Information

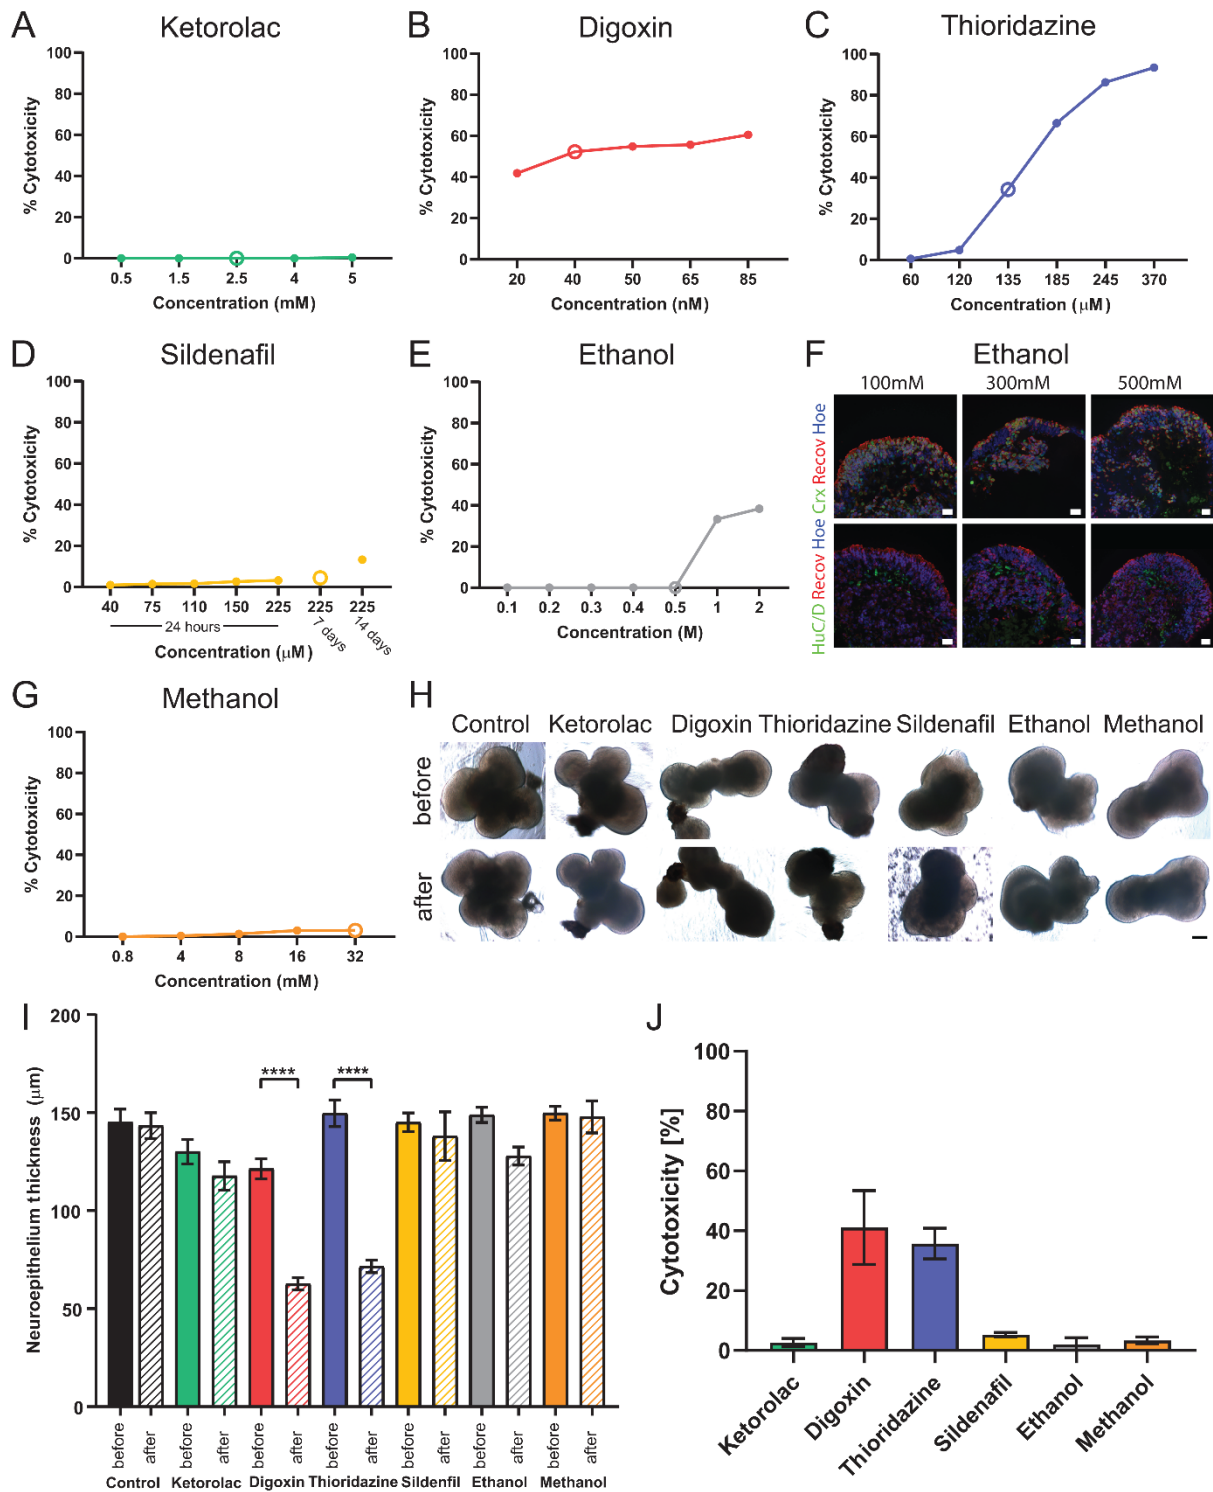

**Fig. S1. Optimal drug concentration evaluation, drug cytotoxicity of drugs and morphological induced changes.** A-G: Assessment of optimal drug concentration whereby each drug was tested using at least 5 different concentrations, shown for Ketorolac (A), Digoxin (B), Thioridazine (C), Sildenafil (D),

Ethanol (**E**) and Methanol (**G**). Non-filled circles denote the final drug concentration used for toxicological experiments. Immunofluorescence for Crx (green), Recoverin (Recov; red) and HuC/D (green) at different Ethanol concentrations revealed minor structural changes after 300 mM Ethanol exposure, which were more prominent in 500 mM Ethanol condition (**F**). Nuclei were counterstained with Hoechst (blue). Scale bars, 20  $\mu$ m. **H**: Brightfield images before and after drug exposure at day 150 of differentiation indicated a thinning of neuroepithelium in Digoxin- and Thioridazine treated organoids. Scale bars, 20  $\mu$ m. **I**: Neuroepithelium quantification revealed a thinning of the neuroepithelium upon Digoxin and Thioridazine treatment. Data are shown as mean  $\pm$  SEM. Differences with a group (before versus after) were considered statistically significant at \*\*\*\* $p < 0.0001$ . **J**: Elicited cytotoxicity on retinal organoids after optimal drug exposure at day 150 of differentiation. Data are represented as mean (WT3 and WT4 pooled)  $\pm$  SEM, N=3. Abbreviations: Hoe, Hoechst.

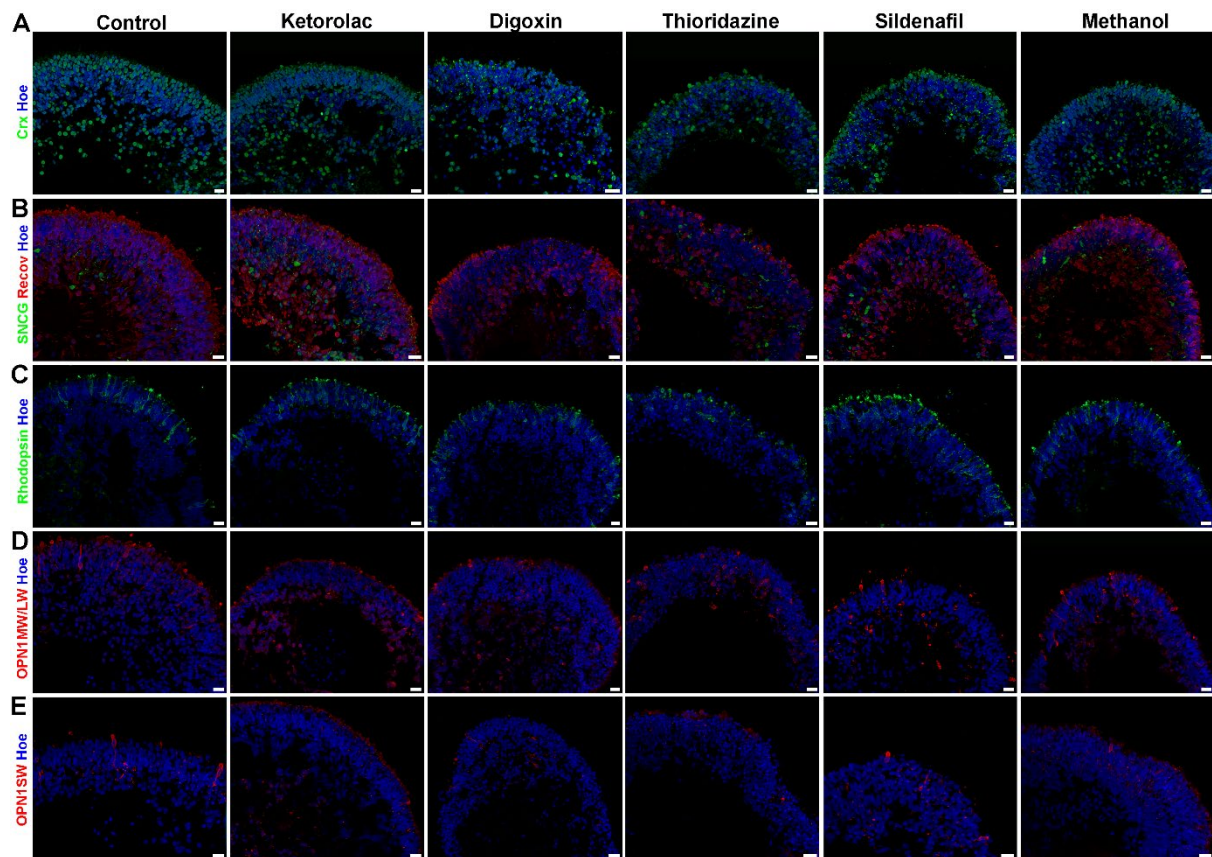

**Fig. S2. Impact of drug treatment on photoreceptors and retinal ganglion cells in WT4 organoids after drug exposure.** A-E: Expression of Crx (A), Recoverin (B), HuC/D (B), Rhodopsin (C), OPN1MW/LW (D) and OPN1SW (E) at day 150 of differentiation. Crx (green; A), Recoverin (red; B), Rhodopsin (green; C), OPN1MW/LW (red; D) and OPN1SW (red; E) immunoreactivity was observed at the apical edge of retinal organoids, revealing changes after Digoxin and Thioridazine treatment compared to control organoids. HuC/D-positive retinal ganglion cells (green) were found in the center of retinal organoids. Digoxin and Thioridazine exposure affected HuC/D expression negatively (B). Nuclei were counterstained with Hoechst (blue). Scale bars, 20  $\mu\text{m}$ . Abbreviations: Hoe, Hoechst; Recov, Recoverin.

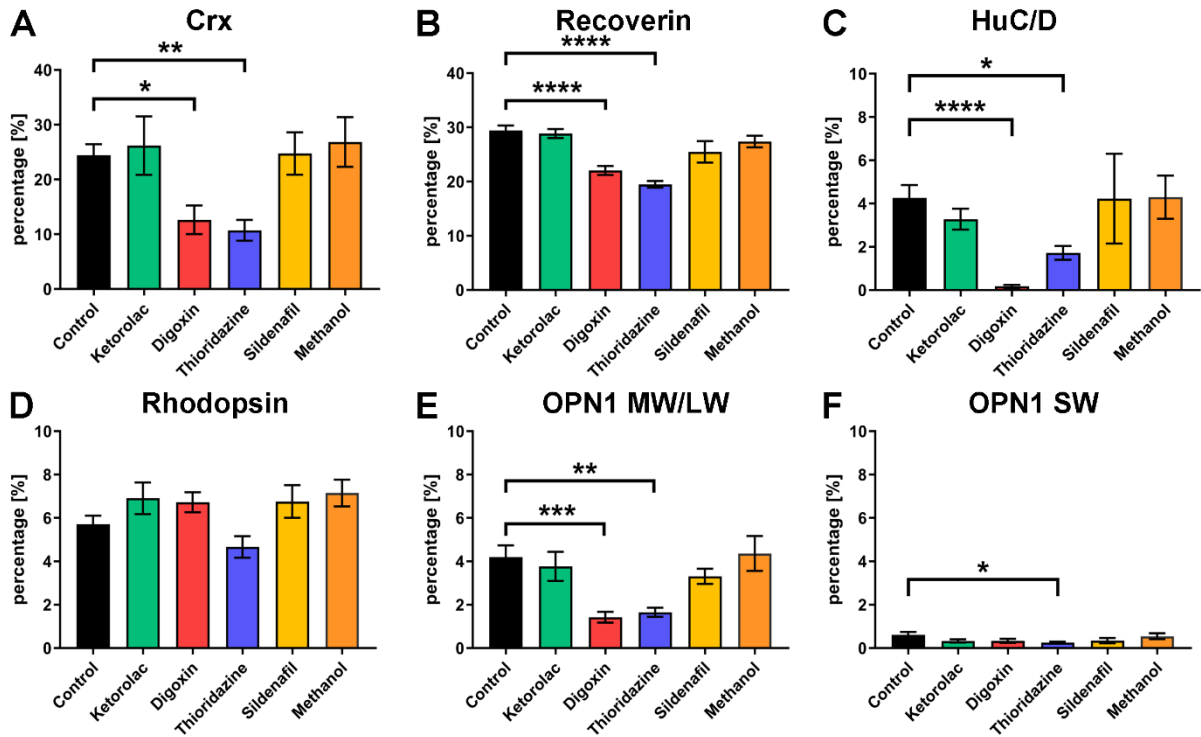

**Fig. S3. Immunofluorescence quantification of retinal organoids derived from WT4-iPSCs at day 150 of differentiation.** A-F: Significantly fewer positive cells for Crx (A), Recoverin (B), HuC/D (C), OPN1MW/LW were detected in Digoxin and Thioridazine treated organoids, whereas a significant reduction in OPN1SW-positive cells (F) was seen only after Thioridazine exposure. Rhodopsin expression was not significantly different across all conditions (D). Data represents the mean  $\pm$  SEM, of 5-10 images from different organoids were quantified per condition. Differences were considered statistically significant at \* $p < 0.05$ , \*\* $p < 0.01$ , \*\*\* $p < 0.001$  and \*\*\*\* $p < 0.0001$ . Please note, IF analysis for Ethanol group was not possible due to sections being fragile.

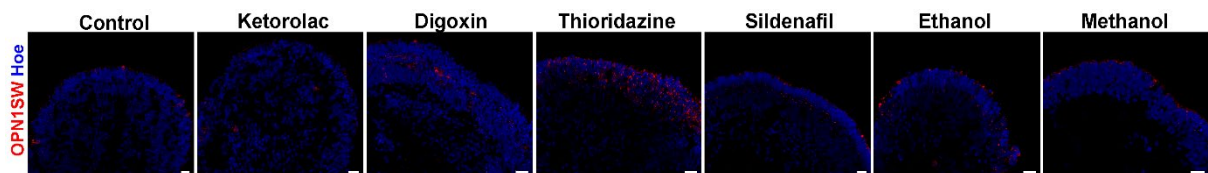

**Fig. S4. Expression of short wavelength opsin in retinal organoids derived from WT3-retinal organoids at day 150 of differentiation.** Expression of OPN1SW (red) at the organoid's apical edge and was less prominent after Sildenafil exposure. Nuclei were counterstained with Hoechst (blue). Scale bars, 20  $\mu$ m. Abbreviations: Hoe, Hoechst.

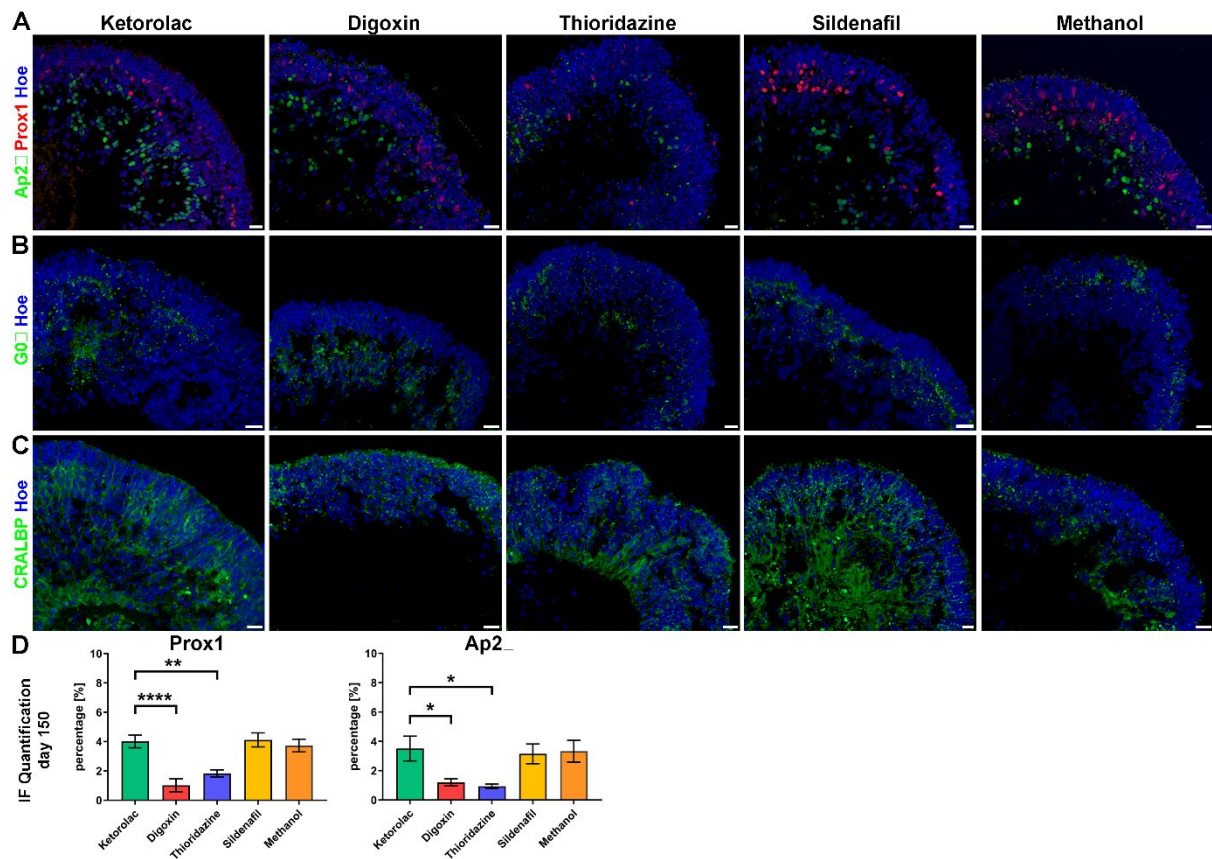

**Fig. S5. Drug effects on bipolar, horizontal, amacrine and Müller glial cells in WT4- derived retinal organoids.** **A-C:** Expression of horizontal (Prox1; red), amacrine (Ap2 $\alpha$ ; green), bipolar (G0 $\alpha$ ; green) and Müller glia cells at day 150 of differentiation. Horizontal (Prox1; red) and amacrine cell (Ap2 $\alpha$ ; green) were less organized after Digoxin and Thioridazine exposure compared to retinal organoids in the drug control condition, Ketorolac (**A**). Bipolar cells (G0 $\alpha$ ; green) were found in all conditions, even so the expression of this marker was low (**B**). Müller glia cells were disrupted and/or disorganized after Digoxin and Thioridazine treatment, respectively (**C**). Nuclei were counterstained with Hoechst (blue). Scale bars, 20  $\mu$ m. **B:** Immunofluorescence quantification of Prox1 and Ap2 $\alpha$  for all conditions indicated a decrease in the percentage of horizontal and amacrine cells after Digoxin and Thioridazine exposure. Data are shown as mean  $\pm$  SEM, of 5-8 images from different organoids were quantified per condition. Differences were considered statistically significant at \* $p < 0.05$ , \*\* $p < 0.01$  and \*\*\*\* $p < 0.0001$ . Abbreviations: Hoe, Hoechst. Please note IF analysis for Ethanol group was not possible due to sections being fragile.

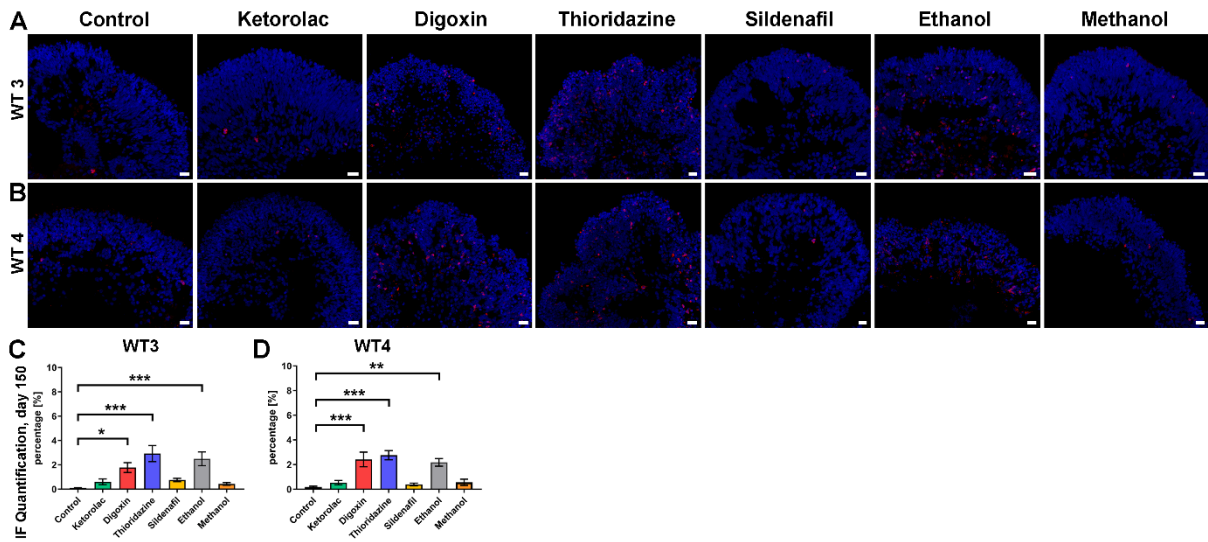

**Fig. S6. Increase of cell death after drug exposure in retinal organoids at day 150 of differentiation.**  
**A, B:** Expression of Casp-3 (red) in WT3 derived retinal organoids (**A**) and WT4 derived retinal organoids (**B**), indicated an increase of apoptotic-induced cell death upon Digoxin, Thioridazine and Ethanol treatment. Nuclei were counterstained with Hoechst (blue). Scale bars, 20  $\mu$ m. **C, D:** IF quantification of Casp-3<sup>+</sup> cells confirmed significant rise after Digoxin, Thioridazine and Ethanol in retinal organoids derived from WT3 (**C**) and WT4 (**D**). Data are shown as mean  $\pm$  SEM of 5-8 images from different organoids were quantified per condition. Differences were considered statistically significant at \*\* $p < 0.01$  and \*\*\* $p < 0.001$ . Abbreviations: Hoe, Hoechst.

**Table S1:** Comparison of statistical significances of WT3 derived retinal organoids using a one-way ANOVA followed by Bonferroni statistical hypothesis for multiple test correction for control versus drugs and Ketorolac versus drugs/compounds (drugs/compounds: Digoxin, Thioridazine, Sildenafil, Ethanol, Methanol; control = PBS treated organoids, Ketorolac = drug control; Abbreviations: Recov, Recoverin; Rho, Rhodopsin).

| Marker                        | Digoxin |           | Thioridazine |           | Sildenafil |           | Ethanol |           | Methanol |           |
|-------------------------------|---------|-----------|--------------|-----------|------------|-----------|---------|-----------|----------|-----------|
|                               | Control | Ketorolac | Control      | Ketorolac | Control    | Ketorolac | Control | Ketorolac | Control  | Ketorolac |
| <b>Recov</b>                  | **      | **        | ***          | ***       | ns         | ns        | ns      | ns        | ns       | ns        |
| <b>Crx</b>                    | **      | **        | *            | *         | ns         | ns        | ns      | ns        | ns       | ns        |
| <b>Rho</b>                    | ns      | ns        | ns           | ns        | ns         | ns        | ns      | ns        | ns       | ns        |
| <b>OPN1<br/>MW/LW</b>         | **      | **        | ns           | ns        | *          | *         | *       | *         | *        | *         |
| <b>OPN1<br/>SW</b>            | ns      | ns        | ns           | ns        | *          | *         | ns      | ns        | ns       | ns        |
| <b>G0<math>\alpha</math></b>  | ns      | ns        | ns           | ns        | ns         | ns        | ns      | ns        | ns       | ns        |
| <b>Prox1</b>                  | ***     | ***       | **           | ***       | ns         | ns        | ns      | ns        | ns       | ns        |
| <b>Ap2<math>\alpha</math></b> | **      | ***       | ns           | *         | ns         | ns        | ns      | ns        | ns       | ns        |
| <b>SNCG</b>                   | **      | *         | ns           | ns        | ns         | ns        | ns      | ns        | ns       | ns        |
| <b>HuC/D</b>                  | ***     | *         | *            | ns        | ns         | ns        | ns      | ns        | ns       | ns        |
| <b>Casp-3</b>                 | *       | *         | ***          | ***       | ns         | ns        | ***     | **        | ns       | ns        |
